# Supplementary material
Source: PubMed Central journal article supplement (PMC6954345)

**Supplementary Table 1** Number of surveillance endoscopies and various interval between the first index and first surveillance endoscopy for different major comparison groups

|                                                       | No polyp | All conventional adenoma | Non-advanced conventional adenoma | Advanced conventional adenoma | All serrated polyp | Small serrated polyp | Large serrated polyp |
|-------------------------------------------------------|----------|--------------------------|-----------------------------------|-------------------------------|--------------------|----------------------|----------------------|
| <b>Number of surveillance endoscopies</b>             |          |                          |                                   |                               |                    |                      |                      |
| 0                                                     | 24%      | 9%                       | 9%                                | 9%                            | 10%                | 11%                  | 11%                  |
| 1                                                     | 28%      | 20%                      | 20%                               | 20%                           | 21%                | 21%                  | 23%                  |
| 2                                                     | 19%      | 22%                      | 23%                               | 20%                           | 22%                | 21%                  | 25%                  |
| >2                                                    | 29%      | 48%                      | 47%                               | 51%                           | 47%                | 47%                  | 41%                  |
| <b>Having had at least one surveillance endoscopy</b> |          |                          |                                   |                               |                    |                      |                      |
| By 4 years                                            | 28%      | 59%                      | 59%                               | 60%                           | 54%                | 54%                  | 54%                  |
| By 6 years                                            | 42%      | 73%                      | 73%                               | 72%                           | 69%                | 68%                  | 67%                  |
| By 8 years                                            | 49%      | 76%                      | 76%                               | 76%                           | 74%                | 73%                  | 70%                  |
| By 10 years                                           | 54%      | 77%                      | 77%                               | 77%                           | 76%                | 75%                  | 72%                  |

**Supplementary Table 2** Polyp subtypes diagnosed at the first endoscopy and subsequent risk of CRC in the three cohorts (NHS [1990-2012], NHS2 [1989-2013] and HPFS [1990-2012])<sup>a</sup>

|                          | No. of participants | No. of colorectal cancer cases | Model 1 <sup>b</sup> | P     | Model 2 <sup>c</sup> | P     | Model 3 <sup>d</sup> | P      |
|--------------------------|---------------------|--------------------------------|----------------------|-------|----------------------|-------|----------------------|--------|
| Non-polyp group          | 112107              | 427                            | 1(ref)               |       | 1(ref)               |       | 1(ref)               |        |
| Conventional adenomas    |                     |                                |                      |       |                      |       |                      |        |
| Proximal colon           | 1975                | 10                             | 1.44 (0.76-2.70)     | 0.26  | 1.35 (0.72-2.53)     | 0.36  | 2.15 (1.13-4.06)     | 0.02   |
| Distal colon             | 2448                | 24                             | 2.02 (1.34-3.05)     | 0.001 | 1.83 (1.21-2.77)     | 0.004 | 2.69 (1.77-4.09)     | <0.001 |
| Rectum                   | 763                 | 4                              | 1.26 (0.47-3.37)     | 0.65  | 1.17 (0.44-3.14)     | 0.76  | 1.77 (0.66-4.76)     | 0.26   |
| $P_{\text{interaction}}$ |                     |                                | 0.69                 |       | 0.83                 |       | 0.91                 |        |

Abbreviations: CRC, colorectal cancer; NHS, the Nurses' Health Study; NHS2, the Nurses' Health Study 2; HPFS, the Health Professionals Follow-up Study; HR, hazard ratio; CI, confidence interval.

<sup>a</sup> Advanced conventional adenomas were defined as at least one conventional adenoma of  $\geq 10$  mm in diameter or with advanced histology (tubulovillous/villous histological features or high grade or severe dysplasia), otherwise were defined as non-advanced conventional adenomas.

<sup>b</sup> Model 1 was adjusted by age at first endoscopy, study cohort (NHS, NHS2, HPFS), and year of first endoscopy (continuous).

<sup>c</sup> Model 2 was further adjusted for reason for the first endoscopy (routine screening or symptom), family history of colorectal cancer (yes or no), pack-year of smoking (continuous), body mass index (continuous), physical activity (<7.5, 7.5-14.9, 15-29.9, and  $\geq 30$  MET-hours/week), alcohol intake (no drinking, <3.5, 3.5-6.9, and  $\geq 7.0$  g/day for women; no drinking, <7.0, 7.0-13.9, or  $\geq 14.0$  g/day for men), and regular aspirin use (yes or no).

<sup>d</sup> Model 3 was additionally adjusted for number of surveillance endoscopies (0, 1, 2, >2), based on model 2.

**Supplementary Table 3** Polyp subtypes diagnosed at the first endoscopy and subsequent risk of CRC in the three cohorts (NHS [1990-2012], NHS2 [1989-2013] and HPFS [1990-2012])

|                                | Non-polyp group | Synchronous conventional adenomas and serrated polyps |
|--------------------------------|-----------------|-------------------------------------------------------|
| No. of participants            | 112107          | 1287                                                  |
| No. of colorectal cancer cases | 427             | 11                                                    |
| Model 1 <sup>a</sup>           | 1 (ref)         | 2.06 (1.12-3.75)                                      |
| P                              |                 | 0.02                                                  |
| Model 2 <sup>b</sup>           | 1 (ref)         | 1.79 (0.98-3.28)                                      |
| P                              |                 | 0.06                                                  |
| Model 3 <sup>c</sup>           | 1 (ref)         | 2.69 (1.46-4.93)                                      |
| P                              |                 | 0.002                                                 |

Abbreviations: CRC, colorectal cancer; NHS, the Nurses' Health Study; NHS2, the Nurses' Health Study 2; HPFS, the Health Professionals Follow-up Study; HR, hazard ratio; CI, confidence interval.

<sup>a</sup> Model 1 was adjusted by age at first endoscopy, study cohort (NHS, NHS2, HPFS), and year of first endoscopy (continuous).

<sup>b</sup> Model 2 was further adjusted for reason for the first endoscopy (routine screening or symptom), family history of colorectal cancer (yes or no), pack-year of smoking (continuous), body mass index (continuous), physical activity (<7.5, 7.5-14.9, 15-29.9, and  $\geq 30$  MET-hours/week), alcohol intake (no drinking, <3.5, 3.5-6.9, and  $\geq 7.0$  g/day for women; no drinking, <7.0, 7.0-13.9, or  $\geq 14.0$  g/day for men), and regular aspirin use (yes or no).

<sup>c</sup> Model 3 was additionally adjusted for number of surveillance endoscopies (0, 1, 2, >2), based on model 2.

**Supplementary table 4** Polyp subtypes diagnosed at the first colonoscopy and subsequent risk of CRC in the three cohorts (NHS [1990-2012], NHS2 [1989-2013] and HPFS [1990-2012])<sup>a</sup>

|                        | No. of participants | No. of colorectal cancer cases | Model 1 <sup>b</sup> | P      | Model 2 <sup>c</sup> | P      | Model 3 <sup>d</sup> | P      |
|------------------------|---------------------|--------------------------------|----------------------|--------|----------------------|--------|----------------------|--------|
| Non-polyp group        | 73913               | 162                            | 1(ref)               |        | 1(ref)               |        | 1(ref)               |        |
| Conventional adenomas  | 5233                | 35                             | 1.93 (1.33-2.80)     | 0.001  | 1.84 (1.27-2.68)     | 0.001  | 3.17 (2.15-4.68)     | <0.001 |
| Non-advanced adenomas  | 3217                | 8                              | 0.84 (0.41-1.72)     | 0.64   | 0.81 (0.40-1.66)     | 0.57   | 1.33 (0.65-2.75)     | 0.43   |
| Advanced adenomas      | 2016                | 27                             | 3.15 (2.07-4.77)     | <0.001 | 2.98 (1.96-4.54)     | <0.001 | 5.44 (3.52-8.41)     | <0.001 |
| Serrated polyps        | 5058                | 15                             | 1.08 (0.63-1.84)     | 0.78   | 1.02 (0.59-1.73)     | 0.96   | 1.55 (0.90-2.67)     | 0.11   |
| <10 mm serrated polyps | 4283                | 11                             | 0.94 (0.51-1.73)     | 0.84   | 0.89 (0.48-1.65)     | 0.71   | 1.37 (0.73-2.55)     | 0.33   |
| ≥10 mm serrated polyps | 511                 | 4                              | 3.19 (1.18-8.62)     | 0.02   | 3.00 (1.10-8.13)     | 0.03   | 5.03 (1.84-13.8)     | 0.002  |

Abbreviations: CRC, colorectal cancer; NHS, the Nurses' Health Study; NHS2, the Nurses' Health Study 2; HPFS, the Health Professionals Follow-up Study; HR, hazard ratio; CI, confidence interval.

<sup>a</sup> Advanced conventional adenomas were defined as at least one conventional adenoma of ≥10 mm in diameter or with advanced histology (tubulovillous/villous histological features or high grade or severe dysplasia), otherwise were defined as non-advanced conventional adenomas.

<sup>b</sup> Model 1 was adjusted by age at first endoscopy, study cohort (NHS, NHS2, HPFS), and year of first endoscopy (continuous).

<sup>c</sup> Model 2 was further adjusted for reason for the first endoscopy (routine screening or symptom), family history of colorectal cancer (yes or no), pack-year of smoking (continuous), body mass index (continuous), physical activity (<7.5, 7.5-14.9, 15-29.9, and ≥30 MET-hours/week), alcohol intake (no drinking, <3.5, 3.5-6.9, and ≥7.0 g/day for women; no drinking, <7.0, 7.0-13.9, or ≥14.0 g/day for men), and regular aspirin use (yes or no), based on Model 1.

<sup>d</sup> Model 3 was additionally adjusted for number of surveillance endoscopies (0, 1, 2, >2), based on model 2.

**Supplementary Table 5** Polyp subtypes diagnosed at the first endoscopy with indication for screening and subsequent risk of CRC in the three cohorts (NHS [1990-2012], NHS2 [1989-2013] and HPFS [1990-2012])<sup>a</sup>

|                        | No. of participants | No. of colorectal cancer cases | Model 1 <sup>b</sup> | P      | Model 2 <sup>c</sup> | P      | Model 3 <sup>d</sup> | P      |
|------------------------|---------------------|--------------------------------|----------------------|--------|----------------------|--------|----------------------|--------|
| Non-polyp group        | 74618               | 254                            | 1(ref)               |        | 1(ref)               |        | 1(ref)               |        |
| Conventional adenomas  | 3799                | 25                             | 1.95 (1.29-2.96)     | 0.002  | 1.77 (1.17-2.69)     | 0.007  | 2.75 (1.80-4.22)     | <0.001 |
| Non-advanced adenomas  | 2458                | 9                              | 1.26 (0.65-2.47)     | 0.49   | 1.17 (0.60-2.28)     | 0.65   | 1.78 (0.91-3.50)     | 0.09   |
| Advanced adenomas      | 1341                | 16                             | 2.82 (1.69-4.70)     | <0.001 | 2.51 (1.50-4.19)     | <0.001 | 4.00 (2.37-6.72)     | <0.001 |
| Serrated polyps        | 3824                | 12                             | 1.13 (0.63-2.03)     | 0.67   | 1.00 (0.56-1.80)     | 0.99   | 1.50(0.83-2.70)      | 0.18   |
| <10 mm serrated polyps | 3248                | 10                             | 1.14 (0.60-2.15)     | 0.69   | 1.02 (0.54-1.92)     | 0.96   | 1.53 (0.81-2.91)     | 0.19   |
| ≥10 mm serrated polyps | 373                 | 1                              | 1.04 (0.15-7.43)     | 0.97   | 0.88 (0.12-6.30)     | 0.90   | 1.24 (0.17-8.93)     | 0.83   |

Abbreviations: CRC, colorectal cancer; NHS, the Nurses' Health Study; NHS2, the Nurses' Health Study 2; HPFS, the Health Professionals Follow-up Study; HR, hazard ratio; CI, confidence interval.

<sup>a</sup> Advanced conventional adenomas were defined as at least one conventional adenoma of ≥10 mm in diameter or with advanced histology (tubulovillous/villous histological features or high grade or severe dysplasia), otherwise were defined as non-advanced conventional adenomas.

<sup>b</sup> Model 1 was adjusted by age at first endoscopy, study cohort (NHS, NHS2, HPFS), and year of first endoscopy (continuous).

<sup>c</sup> Model 2 was further adjusted for family history of colorectal cancer (yes or no), pack-year of smoking (continuous), body mass index (continuous), physical activity (<7.5, 7.5-14.9, 15-29.9, and ≥30 MET-hours/week), alcohol intake (no drinking, <3.5, 3.5-6.9, and ≥7.0 g/day for women; no drinking, <7.0, 7.0-13.9, or ≥14.0 g/day for men), and regular aspirin use (yes or no), based on Model 1.

<sup>d</sup> Model 3 was additionally adjusted for number of surveillance endoscopies (0, 1, 2, >2), based on model 2.

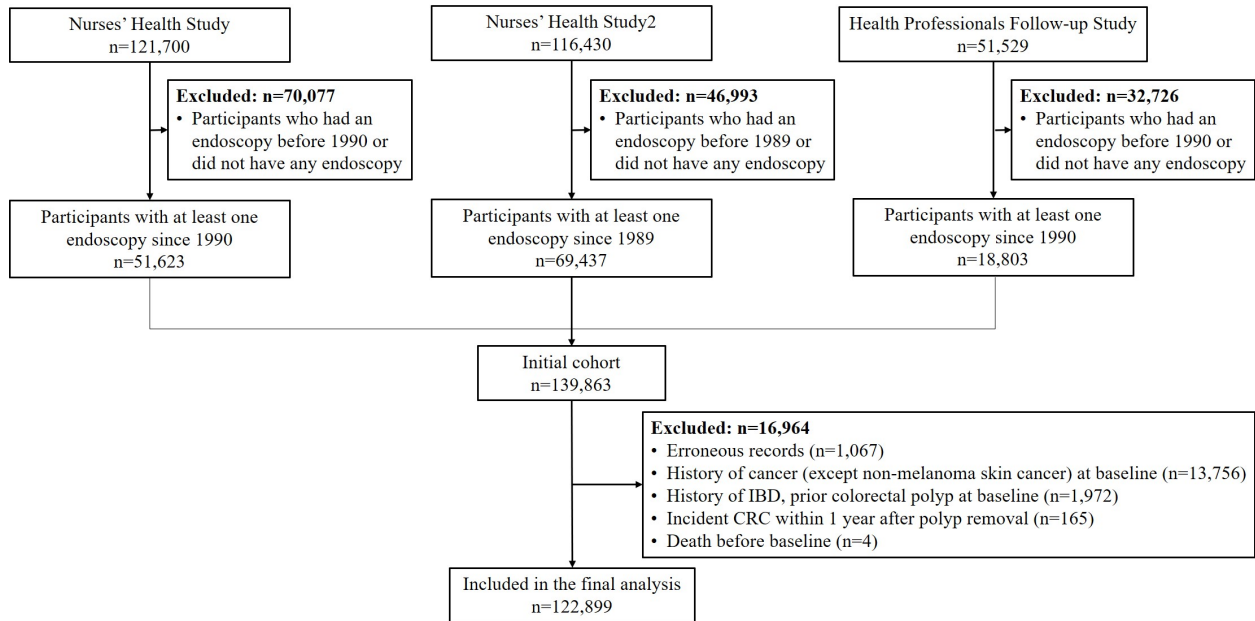

Supplement: NIHMS1534323-supplement-2.pdf [file NIHMS1534323-supplement-2.pdf]
